# Supplementary material for: The “Ifs” and “Hows” of the Role of Music on the Implementation of Emotional Regulation Strategies
Source: MDPI journal article supplement (doi:10.3390/bs12060199), 2022-06-20
Supplement: s1 [file s1]

# Results

## Correlation

Pearson's Correlations

| Variable     |             | StroopAbs | NA P   | NA N   | A P   | A N    | MD |
|--------------|-------------|-----------|--------|--------|-------|--------|----|
| 1. StroopAbs | Pearson's r | —         |        |        |       |        |    |
|              | p-value     | —         |        |        |       |        |    |
| 2. NA P      | Pearson's r | 0.062     | —      |        |       |        |    |
|              | p-value     | 0.675     | —      |        |       |        |    |
| 3. NA N      | Pearson's r | −0.198    | 0.221  | —      |       |        |    |
|              | p-value     | 0.178     | 0.131  | —      |       |        |    |
| 4. A P       | Pearson's r | −0.117    | 0.080  | −0.186 | —     |        |    |
|              | p-value     | 0.428     | 0.591  | 0.206  | —     |        |    |
| 5. A N       | Pearson's r | 0.259     | −0.146 | −0.167 | 0.022 | —      |    |
|              | p-value     | 0.076     | 0.322  | 0.256  | 0.885 | —      |    |
| 6. MD        | Pearson's r | 0.076     | −0.087 | −0.079 | 0.115 | −0.158 | —  |
|              | p-value     | 0.609     | 0.556  | 0.593  | 0.438 | 0.282  | —  |

\* p < .05, \*\* p < .01, \*\*\* p < .001

# Exploratory Factor Analysis

## Chi-squared Test

|       | Value | df | p |
|-------|-------|----|---|
| Model | 0.000 | -3 |   |

*Warning:* Degrees of freedom below 0, model is unidentified.

## Factor Loadings

|           | Factor 1 | Factor 2 | Factor 3 | Factor 4 | Uniqueness |
|-----------|----------|----------|----------|----------|------------|
| StroopAbs | 1.084    |          |          |          | 0.200      |
| NA P      |          | 1.015    |          |          | 0.282      |
| A P       |          |          | 0.920    |          | 0.340      |
| MD        |          |          |          | 0.608    | 0.646      |
| NA N      |          |          |          |          | 0.776      |
| A N       |          |          |          |          | 0.706      |

*Note.* Applied rotation method is promax.

## Factor Characteristics

|          | Unrotated solution |                 |            | Rotated solution |                 |            |
|----------|--------------------|-----------------|------------|------------------|-----------------|------------|
|          | SumSq. Loadings    | Proportion var. | Cumulative | SumSq. Loadings  | Proportion var. | Cumulative |
| Factor 1 | 1.021              | 0.170           | 0.170      | 1.006            | 0.168           | 0.168      |
| Factor 2 | 0.829              | 0.138           | 0.308      | 0.856            | 0.143           | 0.310      |
| Factor 3 | 0.751              | 0.125           | 0.433      | 0.727            | 0.121           | 0.431      |
| Factor 4 | 0.449              | 0.075           | 0.508      | 0.461            | 0.077           | 0.508      |

## Factor Correlations

|          | Factor 1 | Factor 2 | Factor 3 | Factor 4 |
|----------|----------|----------|----------|----------|
| Factor 1 | 1.000    | -0.517   | 0.413    | -0.273   |
| Factor 2 | -0.517   | 1.000    | -0.437   | 0.190    |
| Factor 3 | 0.413    | -0.437   | 1.000    | -0.047   |
| Factor 4 | -0.273   | 0.190    | -0.047   | 1.000    |
