# Supplementary material for: The “Ifs” and “Hows” of the Role of Music on the Implementation of Emotional Regulation Strategies
Source: MDPI journal article supplement (doi:10.3390/bs12060199), 2022-06-20
Supplement: s1 [file s1]

## Comparison of models engaging executive functions (lowest AIC)

```

analysis1: RE ~ Retype * condSTRA * condMU + (1 | ID)
analysis2: RE ~ Retype * condSTRA * condMU * MD + (1 | ID)
analysis4: RE ~ Retype * condSTRA * condMU * NA.P + (1 | ID)
analysis5: RE ~ Retype * condSTRA * condMU * NA.N + (1 | ID)
analysis6: RE ~ Retype * condSTRA * condMU * A.N + (1 | ID)
analysis7: RE ~ Retype * condSTRA * condMU * A.P + (1 | ID)
analysis104: RE ~ Retype * condSTRA * condMU * StroopAbs + (1 | ID)
analysis23: RE ~ Retype * condSTRA * condMU * MD * NA.N + (1 | ID)
analysis101: RE ~ Retype * condSTRA * condMU * StroopAbs * NA.N + (1 | ID)
analysis102: RE ~ Retype * condSTRA * condMU * StroopAbs * MD + (1 | ID)

```

|                   | Df        | AIC           | BIC           | logLik         | deviance      | Chisq         | Chi | Df        | Pr(>Chisq)      |
|-------------------|-----------|---------------|---------------|----------------|---------------|---------------|-----|-----------|-----------------|
| analysis1         | 10        | 167.53        | 193.18        | -73.767        | 147.53        |               |     |           |                 |
| analysis2         | 18        | 170.79        | 216.94        | -67.393        | 134.79        | 12.7468       |     | 8         | 0.120           |
| analysis4         | 18        | 181.07        | 227.23        | -72.537        | 145.07        | 0.0000        |     | 0         | 1.000           |
| analysis5         | 18        | 164.13        | 210.28        | -64.064        | 128.13        | 16.9468       |     | 0         | <2e-16 ***      |
| analysis6         | 18        | 175.65        | 221.81        | -69.827        | 139.65        | 0.0000        |     | 0         | 1.000           |
| analysis7         | 18        | 168.15        | 214.31        | -66.077        | 132.15        | 7.5006        |     | 0         | <2e-16 ***      |
| analysis104       | 18        | 170.24        | 216.40        | -67.121        | 134.24        | 0.0000        |     | 0         | 1.000           |
| <b>analysis23</b> | <b>34</b> | <b>161.97</b> | <b>249.16</b> | <b>-46.987</b> | <b>93.973</b> | <b>34.154</b> |     | <b>16</b> | <b>0.005179</b> |
| analysis101       | 34        | 167.79        | 254.98        | -49.897        | 99.793        | 0             |     | 0         | 1               |
| analysis102       | 34        | 179.20        | 266.38        | -55.598        | 111.196       | 0             |     | 0         | 1               |
